# Supplementary material for: Ultra stable self-assembled monolayers of N-heterocyclic carbenes on gold
Source: Springer Nature journal article supplement (doi:10.1038/nchem.1891), 2014-03-23
Supplement: 41557_2014_BFnchem1891_MOESM11_ESM.mol [file 41557_2014_BFnchem1891_MOESM11_ESM.mol]

  ChemDraw03061404412D

 28 29  0  0  0  0  0  0  0  0999 V2000
   -0.4139   -4.4364    0.0000 C   0  0  0  0  0  0  0  0  0  0  0  0
    0.4139   -4.4364    0.0000 C   0  0  0  0  0  0  0  0  0  0  0  0
    0.8278   -3.7195    0.0000 C   0  0  0  0  0  0  0  0  0  0  0  0
    0.4139   -3.0026    0.0000 C   0  0  0  0  0  0  0  0  0  0  0  0
   -0.4139   -3.0026    0.0000 C   0  0  0  0  0  0  0  0  0  0  0  0
   -0.8278   -3.7195    0.0000 C   0  0  0  0  0  0  0  0  0  0  0  0
   -0.6697   -5.2236    0.0000 N   0  0  0  0  0  0  0  0  0  0  0  0
    0.0000   -5.7102    0.0000 C   0  0  0  0  0  0  0  0  0  0  0  0
    0.6697   -5.2236    0.0000 N   0  0  0  0  0  0  0  0  0  0  0  0
    1.4543   -5.4786    0.0000 C   0  0  0  0  0  0  0  0  0  0  0  0
   -1.4543   -5.4786    0.0000 C   0  0  0  0  0  0  0  0  0  0  0  0
    2.0674   -4.9265    0.0000 C   0  0  0  0  0  0  0  0  0  0  0  0
    1.6258   -6.2855    0.0000 C   0  0  0  0  0  0  0  0  0  0  0  0
   -2.0674   -4.9265    0.0000 C   0  0  0  0  0  0  0  0  0  0  0  0
   -1.6258   -6.2855    0.0000 C   0  0  0  0  0  0  0  0  0  0  0  0
    0.8264   -2.2881    0.0000 O   0  0  0  0  0  0  0  0  0  0  0  0
    0.4139   -1.5736    0.0000 C   0  0  0  0  0  0  0  0  0  0  0  0
    0.8264   -0.8592    0.0000 C   0  0  0  0  0  0  0  0  0  0  0  0
    0.4139   -0.1447    0.0000 C   0  0  0  0  0  0  0  0  0  0  0  0
    0.8264    0.5698    0.0000 C   0  0  0  0  0  0  0  0  0  0  0  0
    0.4139    1.2842    0.0000 C   0  0  0  0  0  0  0  0  0  0  0  0
    0.8264    1.9987    0.0000 C   0  0  0  0  0  0  0  0  0  0  0  0
    0.4139    2.7132    0.0000 C   0  0  0  0  0  0  0  0  0  0  0  0
    0.8264    3.4276    0.0000 C   0  0  0  0  0  0  0  0  0  0  0  0
    0.4139    4.1421    0.0000 C   0  0  0  0  0  0  0  0  0  0  0  0
    0.8264    4.8566    0.0000 C   0  0  0  0  0  0  0  0  0  0  0  0
    0.4139    5.5711    0.0000 C   0  0  0  0  0  0  0  0  0  0  0  0
    0.8264    6.2855    0.0000 C   0  0  0  0  0  0  0  0  0  0  0  0
  1  2  2  0      
  2  3  1  0      
  3  4  2  0      
  4  5  1  0      
  5  6  2  0      
  6  1  1  0      
  1  7  1  0      
  7  8  1  0      
  8  9  1  0      
  9  2  1  0      
  9 10  1  0      
  7 11  1  0      
 10 12  1  0      
 10 13  1  0      
 11 14  1  0      
 11 15  1  0      
  4 16  1  0      
 16 17  1  0      
 17 18  1  0      
 18 19  1  0      
 19 20  1  0      
 20 21  1  0      
 21 22  1  0      
 22 23  1  0      
 23 24  1  0      
 24 25  1  0      
 25 26  1  0      
 26 27  1  0      
 27 28  1  0      
M  RAD  1   8   1
M  END
